# Supplementary material for: The Role of Neuromuscular Blockade in Patients with Traumatic Brain Injury: A Systematic Review
Source: Springer Nature journal article supplement (doi:10.1007/s12028-014-0061-1), 2014-09-02
Supplement: MOESM1 [file 9144376]

**Appendix 1.** Search strategy. MEDLINE (lines 1 to 35) and EMBASE (lines 36 to 70) database were investigated through the *NHS Library Evidence tool*. The core search consisted of the combination of terms obtained from two items: neuromuscular blockers (lines 1 to 23 and 36 to 58) and traumatic brain injury (lines 24 to 34 and 59 to 69). The number of retrieved articles is indicated on the last column.

| 1 | MEDLINE | exp NEUROMUSCULAR BLOCKADE/ | [1357](http://www.library.nhs.uk/hdas/search-results/1?PageNumber=1&PageSize=10&SortBy=srt.unspecified&ShowAbstracts=False&databases=bnj.ovi.prmz) |
| --- | --- | --- | --- |
| 2 | MEDLINE | "neuromuscular block*".ti,ab | [6764](http://www.library.nhs.uk/hdas/search-results/2?PageNumber=1&PageSize=10&SortBy=srt.unspecified&ShowAbstracts=False&databases=bnj.ovi.prmz) |
| 3 | MEDLINE | "neuro muscular block*".ti,ab | [46](http://www.library.nhs.uk/hdas/search-results/3?PageNumber=1&PageSize=10&SortBy=srt.unspecified&ShowAbstracts=False&databases=bnj.ovi.prmz) |
| 4 | MEDLINE | NMB*.ti,ab | [1190](http://www.library.nhs.uk/hdas/search-results/4?PageNumber=1&PageSize=10&SortBy=srt.unspecified&ShowAbstracts=False&databases=bnj.ovi.prmz) |
| 5 | MEDLINE | exp SUCCINYLCHOLINE/ | [5870](http://www.library.nhs.uk/hdas/search-results/5?PageNumber=1&PageSize=10&SortBy=srt.unspecified&ShowAbstracts=False&databases=bnj.ovi.prmz) |
| 6 | MEDLINE | Succinylcholine.ti,ab | [3419](http://www.library.nhs.uk/hdas/search-results/6?PageNumber=1&PageSize=10&SortBy=srt.unspecified&ShowAbstracts=False&databases=bnj.ovi.prmz) |
| 7 | MEDLINE | suxamethonium.ti,ab | [1541](http://www.library.nhs.uk/hdas/search-results/7?PageNumber=1&PageSize=10&SortBy=srt.unspecified&ShowAbstracts=False&databases=bnj.ovi.prmz) |
| 8 | MEDLINE | exp ATRACURIUM/ | [1707](http://www.library.nhs.uk/hdas/search-results/8?PageNumber=1&PageSize=10&SortBy=srt.unspecified&ShowAbstracts=False&databases=bnj.ovi.prmz) |
| 9 | MEDLINE | atracurium.ti,ab | [1840](http://www.library.nhs.uk/hdas/search-results/9?PageNumber=1&PageSize=10&SortBy=srt.unspecified&ShowAbstracts=False&databases=bnj.ovi.prmz) |
| 10 | MEDLINE | Cisatracurium.ti,ab | [433](http://www.library.nhs.uk/hdas/search-results/10?PageNumber=1&PageSize=10&SortBy=srt.unspecified&ShowAbstracts=False&databases=bnj.ovi.prmz) |
| 11 | MEDLINE | doxacurium.ti,ab | [85](http://www.library.nhs.uk/hdas/search-results/11?PageNumber=1&PageSize=10&SortBy=srt.unspecified&ShowAbstracts=False&databases=bnj.ovi.prmz) |
| 12 | MEDLINE | metocurine.ti,ab | [142](http://www.library.nhs.uk/hdas/search-results/12?PageNumber=1&PageSize=10&SortBy=srt.unspecified&ShowAbstracts=False&databases=bnj.ovi.prmz) |
| 13 | MEDLINE | mivacurium.ti,ab | [654](http://www.library.nhs.uk/hdas/search-results/13?PageNumber=1&PageSize=10&SortBy=srt.unspecified&ShowAbstracts=False&databases=bnj.ovi.prmz) |
| 14 | MEDLINE | exp PANCURONIUM/ | [2146](http://www.library.nhs.uk/hdas/search-results/14?PageNumber=1&PageSize=10&SortBy=srt.unspecified&ShowAbstracts=False&databases=bnj.ovi.prmz) |
| 15 | MEDLINE | pancuronium.ti,ab | [2594](http://www.library.nhs.uk/hdas/search-results/15?PageNumber=1&PageSize=10&SortBy=srt.unspecified&ShowAbstracts=False&databases=bnj.ovi.prmz) |
| 16 | MEDLINE | exp PIPECURONIUM/ | [204](http://www.library.nhs.uk/hdas/search-results/16?PageNumber=1&PageSize=10&SortBy=srt.unspecified&ShowAbstracts=False&databases=bnj.ovi.prmz) |
| 17 | MEDLINE | pipecuronium.ti,ab | [188](http://www.library.nhs.uk/hdas/search-results/17?PageNumber=1&PageSize=10&SortBy=srt.unspecified&ShowAbstracts=False&databases=bnj.ovi.prmz) |
| 18 | MEDLINE | rocuronium.ti,ab | [1524](http://www.library.nhs.uk/hdas/search-results/18?PageNumber=1&PageSize=10&SortBy=srt.unspecified&ShowAbstracts=False&databases=bnj.ovi.prmz) |
| 19 | MEDLINE | exp TUBOCURARINE/ | [4313](http://www.library.nhs.uk/hdas/search-results/19?PageNumber=1&PageSize=10&SortBy=srt.unspecified&ShowAbstracts=False&databases=bnj.ovi.prmz) |
| 20 | MEDLINE | tubocurarine.ti,ab | [3434](http://www.library.nhs.uk/hdas/search-results/20?PageNumber=1&PageSize=10&SortBy=srt.unspecified&ShowAbstracts=False&databases=bnj.ovi.prmz) |
| 21 | MEDLINE | exp VECURONIUM BROMIDE/ | [2017](http://www.library.nhs.uk/hdas/search-results/21?PageNumber=1&PageSize=10&SortBy=srt.unspecified&ShowAbstracts=False&databases=bnj.ovi.prmz) |
| 22 | MEDLINE | vecuronium.ti,ab | [3045](http://www.library.nhs.uk/hdas/search-results/22?PageNumber=1&PageSize=10&SortBy=srt.unspecified&ShowAbstracts=False&databases=bnj.ovi.prmz) |
| 23 | MEDLINE | 1 OR 2 OR 3 OR 4 OR 5 OR 6 OR 7 OR 8 OR 9 OR 10 OR 11 OR 12 OR 13 OR 14 OR 15 OR 16 OR 17 OR 18 OR 19 OR 20 OR 21 OR 22 | [24514](http://www.library.nhs.uk/hdas/search-results/26?PageNumber=1&PageSize=10&SortBy=srt.unspecified&ShowAbstracts=False&databases=bnj.ovi.prmz) |
| 24 | MEDLINE | exp BRAIN INJURIES/ | [45495](http://www.library.nhs.uk/hdas/search-results/27?PageNumber=1&PageSize=10&SortBy=srt.unspecified&ShowAbstracts=False&databases=bnj.ovi.prmz) |
| 25 | MEDLINE | TBI*.ti,ab | [12814](http://www.library.nhs.uk/hdas/search-results/28?PageNumber=1&PageSize=10&SortBy=srt.unspecified&ShowAbstracts=False&databases=bnj.ovi.prmz) |
| 26 | MEDLINE | "traumatic brain injur*".ti,ab | [15792](http://www.library.nhs.uk/hdas/search-results/29?PageNumber=1&PageSize=10&SortBy=srt.unspecified&ShowAbstracts=False&databases=bnj.ovi.prmz) |
| 27 | MEDLINE | "intracranial injur*".ti,ab | [635](http://www.library.nhs.uk/hdas/search-results/30?PageNumber=1&PageSize=10&SortBy=srt.unspecified&ShowAbstracts=False&databases=bnj.ovi.prmz) |
| 28 | MEDLINE | "intra cranial injur*".ti,ab | [6](http://www.library.nhs.uk/hdas/search-results/31?PageNumber=1&PageSize=10&SortBy=srt.unspecified&ShowAbstracts=False&databases=bnj.ovi.prmz) |
| 29 | MEDLINE | "head injur*".ti,ab | [18459](http://www.library.nhs.uk/hdas/search-results/32?PageNumber=1&PageSize=10&SortBy=srt.unspecified&ShowAbstracts=False&databases=bnj.ovi.prmz) |
| 30 | MEDLINE | "brain trauma*".ti,ab | [1650](http://www.library.nhs.uk/hdas/search-results/33?PageNumber=1&PageSize=10&SortBy=srt.unspecified&ShowAbstracts=False&databases=bnj.ovi.prmz) |
| 31 | MEDLINE | "intracranial trauma*".ti,ab | [106](http://www.library.nhs.uk/hdas/search-results/34?PageNumber=1&PageSize=10&SortBy=srt.unspecified&ShowAbstracts=False&databases=bnj.ovi.prmz) |
| 32 | MEDLINE | "intra cranial trauma*".ti,ab | [4](http://www.library.nhs.uk/hdas/search-results/35?PageNumber=1&PageSize=10&SortBy=srt.unspecified&ShowAbstracts=False&databases=bnj.ovi.prmz) |
| 33 | MEDLINE | "head trauma*".ti,ab | [5920](http://www.library.nhs.uk/hdas/search-results/36?PageNumber=1&PageSize=10&SortBy=srt.unspecified&ShowAbstracts=False&databases=bnj.ovi.prmz) |
| 34 | MEDLINE | 24 OR 25 OR 26 OR 27 OR 28 OR 29 OR 30 OR 31 OR 32 OR 33 | [69313](http://www.library.nhs.uk/hdas/search-results/37?PageNumber=1&PageSize=10&SortBy=srt.unspecified&ShowAbstracts=False&databases=bnj.ovi.prmz) |
| **35** | **MEDLINE** | **23 AND 34** | **261** |
| 36 | EMBASE | *NEUROMUSCULAR BLOCKING/ | [4821](http://www.library.nhs.uk/hdas/search-results/39?PageNumber=1&PageSize=10&SortBy=srt.unspecified&ShowAbstracts=False&databases=bnj.ovi.prmz) |
| 37 | EMBASE | "neuromuscular block*".ti,ab | [8082](http://www.library.nhs.uk/hdas/search-results/40?PageNumber=1&PageSize=10&SortBy=srt.unspecified&ShowAbstracts=False&databases=bnj.ovi.prmz) |
| 38 | EMBASE | "neuro muscular block*".ti,ab | [58](http://www.library.nhs.uk/hdas/search-results/41?PageNumber=1&PageSize=10&SortBy=srt.unspecified&ShowAbstracts=False&databases=bnj.ovi.prmz) |
| 39 | EMBASE | NMB*.ti,ab | [1535](http://www.library.nhs.uk/hdas/search-results/42?PageNumber=1&PageSize=10&SortBy=srt.unspecified&ShowAbstracts=False&databases=bnj.ovi.prmz) |
| 40 | EMBASE | *SUXAMETHONIUM/ | [6994](http://www.library.nhs.uk/hdas/search-results/43?PageNumber=1&PageSize=10&SortBy=srt.unspecified&ShowAbstracts=False&databases=bnj.ovi.prmz) |
| 41 | EMBASE | succinylcholine.ti,ab | [3825](http://www.library.nhs.uk/hdas/search-results/44?PageNumber=1&PageSize=10&SortBy=srt.unspecified&ShowAbstracts=False&databases=bnj.ovi.prmz) |
| 42 | EMBASE | suxamethonium.ti,ab | [1667](http://www.library.nhs.uk/hdas/search-results/45?PageNumber=1&PageSize=10&SortBy=srt.unspecified&ShowAbstracts=False&databases=bnj.ovi.prmz) |
| 43 | EMBASE | *ATRACURIUM BESILATE/ | [156](http://www.library.nhs.uk/hdas/search-results/46?PageNumber=1&PageSize=10&SortBy=srt.unspecified&ShowAbstracts=False&databases=bnj.ovi.prmz) |
| 44 | EMBASE | atracurium.ti,ab | [2533](http://www.library.nhs.uk/hdas/search-results/47?PageNumber=1&PageSize=10&SortBy=srt.unspecified&ShowAbstracts=False&databases=bnj.ovi.prmz) |
| 45 | EMBASE | cisatracurium.ti,ab | [639](http://www.library.nhs.uk/hdas/search-results/48?PageNumber=1&PageSize=10&SortBy=srt.unspecified&ShowAbstracts=False&databases=bnj.ovi.prmz) |
| 46 | EMBASE | doxacurium.ti,ab | [112](http://www.library.nhs.uk/hdas/search-results/49?PageNumber=1&PageSize=10&SortBy=srt.unspecified&ShowAbstracts=False&databases=bnj.ovi.prmz) |
| 47 | EMBASE | metocurine.ti,ab | [156](http://www.library.nhs.uk/hdas/search-results/50?PageNumber=1&PageSize=10&SortBy=srt.unspecified&ShowAbstracts=False&databases=bnj.ovi.prmz) |
| 48 | EMBASE | mivacurium.ti,ab | [874](http://www.library.nhs.uk/hdas/search-results/51?PageNumber=1&PageSize=10&SortBy=srt.unspecified&ShowAbstracts=False&databases=bnj.ovi.prmz) |
| 49 | EMBASE | *PANCURONIUM/ | [3456](http://www.library.nhs.uk/hdas/search-results/52?PageNumber=1&PageSize=10&SortBy=srt.unspecified&ShowAbstracts=False&databases=bnj.ovi.prmz) |
| 50 | EMBASE | pancuronium.ti,ab | [2946](http://www.library.nhs.uk/hdas/search-results/53?PageNumber=1&PageSize=10&SortBy=srt.unspecified&ShowAbstracts=False&databases=bnj.ovi.prmz) |
| 51 | EMBASE | *PIPECURONIUM/ | [165](http://www.library.nhs.uk/hdas/search-results/54?PageNumber=1&PageSize=10&SortBy=srt.unspecified&ShowAbstracts=False&databases=bnj.ovi.prmz) |
| 52 | EMBASE | pipecuronium.ti,ab | [258](http://www.library.nhs.uk/hdas/search-results/55?PageNumber=1&PageSize=10&SortBy=srt.unspecified&ShowAbstracts=False&databases=bnj.ovi.prmz) |
| 53 | EMBASE | rocuronium.ti,ab | [2200](http://www.library.nhs.uk/hdas/search-results/56?PageNumber=1&PageSize=10&SortBy=srt.unspecified&ShowAbstracts=False&databases=bnj.ovi.prmz) |
| 54 | EMBASE | *TUBOCURARINE CHLORIDE/ | [4084](http://www.library.nhs.uk/hdas/search-results/57?PageNumber=1&PageSize=10&SortBy=srt.unspecified&ShowAbstracts=False&databases=bnj.ovi.prmz) |
| 55 | EMBASE | tubocurarine.ti,ab | [3167](http://www.library.nhs.uk/hdas/search-results/58?PageNumber=1&PageSize=10&SortBy=srt.unspecified&ShowAbstracts=False&databases=bnj.ovi.prmz) |
| 56 | EMBASE | *VECURONIUM/ | [2753](http://www.library.nhs.uk/hdas/search-results/59?PageNumber=1&PageSize=10&SortBy=srt.unspecified&ShowAbstracts=False&databases=bnj.ovi.prmz) |
| 57 | EMBASE | vecuronium.ti,ab | [4047](http://www.library.nhs.uk/hdas/search-results/60?PageNumber=1&PageSize=10&SortBy=srt.unspecified&ShowAbstracts=False&databases=bnj.ovi.prmz) |
| 58 | EMBASE | 36 OR 37 OR 38 OR 39 OR 40 OR 41 OR 42 OR 43 OR 44 OR 45 OR 46 OR 47 OR 48 OR 49 OR 50 OR 51 OR 52 OR 53 OR 54 OR 55 OR 56 OR 57 | [29882](http://www.library.nhs.uk/hdas/search-results/64?PageNumber=1&PageSize=10&SortBy=srt.unspecified&ShowAbstracts=False&databases=bnj.ovi.prmz) |
| 59 | EMBASE | exp TRAUMATIC BRAIN INJURY/ | [15667](http://www.library.nhs.uk/hdas/search-results/65?PageNumber=1&PageSize=10&SortBy=srt.unspecified&ShowAbstracts=False&databases=bnj.ovi.prmz) |
| 60 | EMBASE | TBI*.ti,ab | [18845](http://www.library.nhs.uk/hdas/search-results/66?PageNumber=1&PageSize=10&SortBy=srt.unspecified&ShowAbstracts=False&databases=bnj.ovi.prmz) |
| 61 | EMBASE | "traumatic brain injur*".ti,ab | [21869](http://www.library.nhs.uk/hdas/search-results/67?PageNumber=1&PageSize=10&SortBy=srt.unspecified&ShowAbstracts=False&databases=bnj.ovi.prmz) |
| 62 | EMBASE | "intracranial injur*".ti,ab | [791](http://www.library.nhs.uk/hdas/search-results/68?PageNumber=1&PageSize=10&SortBy=srt.unspecified&ShowAbstracts=False&databases=bnj.ovi.prmz) |
| 63 | EMBASE | "intra cranial injur*".ti,ab | [8](http://www.library.nhs.uk/hdas/search-results/69?PageNumber=1&PageSize=10&SortBy=srt.unspecified&ShowAbstracts=False&databases=bnj.ovi.prmz) |
| 64 | EMBASE | "head injur*".ti,ab | [21905](http://www.library.nhs.uk/hdas/search-results/70?PageNumber=1&PageSize=10&SortBy=srt.unspecified&ShowAbstracts=False&databases=bnj.ovi.prmz) |
| 65 | EMBASE | "brain trauma*".ti,ab | [2092](http://www.library.nhs.uk/hdas/search-results/71?PageNumber=1&PageSize=10&SortBy=srt.unspecified&ShowAbstracts=False&databases=bnj.ovi.prmz) |
| 66 | EMBASE | "intracranial trauma*".ti,ab | [123](http://www.library.nhs.uk/hdas/search-results/72?PageNumber=1&PageSize=10&SortBy=srt.unspecified&ShowAbstracts=False&databases=bnj.ovi.prmz) |
| 67 | EMBASE | "intra cranial trauma*".ti,ab | [5](http://www.library.nhs.uk/hdas/search-results/73?PageNumber=1&PageSize=10&SortBy=srt.unspecified&ShowAbstracts=False&databases=bnj.ovi.prmz) |
| 68 | EMBASE | "head trauma*".ti,ab | [7573](http://www.library.nhs.uk/hdas/search-results/74?PageNumber=1&PageSize=10&SortBy=srt.unspecified&ShowAbstracts=False&databases=bnj.ovi.prmz) |
| 69 | EMBASE | 59 OR 60 OR 61 OR 62 OR 63 OR 64 OR 65 OR 66 OR 67 OR 68 OR 69 | [59083](http://www.library.nhs.uk/hdas/search-results/75?PageNumber=1&PageSize=10&SortBy=srt.unspecified&ShowAbstracts=False&databases=bnj.ovi.prmz) |
| **70** | **EMBASE** | **58 AND 69** | **3**[**1**](http://www.library.nhs.uk/hdas/search-results/76?PageNumber=1&PageSize=10&SortBy=srt.unspecified&ShowAbstracts=False&databases=bnj.ovi.prmz)**0** |
|  |  |  |  |
